# Supplementary material for: Valp1, a Newly Identified Temperate Phage Facilitating Coexistence of Lysogenic and Non-Lysogenic Populations of Vibrio anguillarum
Source: MDPI journal article supplement (doi:10.3390/pathogens13040285), 2024-03-27
Supplement: s1 [file s1]

# Valp1, a Newly Identified Temperate Phage Facilitating Coexistence of Lysogenic and Non-Lysogenic Populations of *Vibrio anguillarum*

Manuel Arce <sup>1</sup>, Guillermo Venegas <sup>1</sup>, Karla Paez <sup>1</sup>, Simone Latz <sup>1</sup>, Paola Navarrete <sup>2</sup>, Mario Caruffo <sup>2,3</sup>, Carmen Feijoo <sup>4</sup>, Katherine García <sup>5</sup> and Roberto Bastías <sup>1,\*</sup>

**Table S1.** Host range of phage Valp1 in nine different *V. anguillarum* strains.

|                          | <i>V. anguillarum</i> strain |     |     |       |       |       |       |       |       |
|--------------------------|------------------------------|-----|-----|-------|-------|-------|-------|-------|-------|
|                          | PF4                          | PF8 | PF7 | ATCC  | LGM   | NCIMB | NCIMB | NCIMB | NCIMB |
|                          |                              |     |     | 19264 | 10939 | 1875  | 2129  | 572   | 828   |
| <b>Lysis<sup>a</sup></b> | +                            | +   | -   | -     | -     | -     | -     | +     | -     |

<sup>a</sup> (+) indicates bacterial lysis; (-) indicates no lysis.

**Table S2.** Annotation of Valp1 genome. The genome is deposited in GeneBank under the accession number OR500391.

| ORF    | Nucleotide position | Putative function        | BLAST hit<br>[Accession number]                                                                    | %<br>Aminoacidi<br>c identity | E-value   |
|--------|---------------------|--------------------------|----------------------------------------------------------------------------------------------------|-------------------------------|-----------|
| CDS_01 | 90-296              | Holin                    | Hypothetical protein<br><i>Vibrio</i><br>[WP_016786046.1]                                          | 100                           | 3,00E-39  |
| CDS_02 | 283-555             | Hypothetical protein     | Hypothetical protein<br><i>Vibrio</i><br>[WP_016786045.1]                                          | 100                           | 1,00E-61  |
| CDS_03 | 527-706             | Hypothetical protein     | Hypothetical protein<br><i>Vibrio crassostreae</i><br>[WP_132941303.1]                             | 100                           | 5,00E-34  |
| CDS_04 | 709-831             | Hypothetical protein     | Hypothetical protein<br><i>Vibrio crassostreae</i><br>WP_282597755.1                               | 100                           | 2,00E-21  |
| CDS_05 | 852-1010            | Hypothetical protein     | No match                                                                                           | -                             | -         |
| CDS_06 | 1048-1227           | Rz-like spanin           | Hypothetical protein<br><i>Vibrio crassostreae</i><br>[TCN02923.1]                                 | 100                           | 1,00E-34  |
| CDS_07 | 1229-1633           | Hypothetical protein     | DUF2570 family<br>protein <i>Vibrio</i><br><i>crassostreae</i><br>[WP_132941302.1]                 | 100                           | 1,00E-93  |
| CDS_08 | 1635-2159           | Endolysin                | Lysozyme <i>Vibrio</i><br>[WP_016786041.1]                                                         | 100                           | 3,00E-127 |
| CDS_09 | 2159-2437           | Holin                    | HP1 family phage<br>holin <i>Vibrio</i><br>[WP_016786040.1]                                        | 100                           | 4,00E-57  |
| CDS_10 | 2461-3507           | DNA<br>methyltransferase | DNA<br>methyltransferase<br><i>Vibrio</i><br>[WP_016786039.1]                                      | 100                           | 0.0       |
| CDS_11 | 3522-3647           | Hypothetical protein     | DNA-directed RNA<br>polymerase subunit P<br><i>Vibrio</i> phage<br>vB_Va_Val-yong3<br>[UVD31987.1] | 92                            | 1,00E-15  |
| CDS_12 | 3715-3807           | Hypothetical protein     | No match                                                                                           | -                             | -         |
| CDS_13 | 3923-4219           | Hypothetical protein     | Hypothetical protein<br><i>Vibrio crassostreae</i><br>[WP_132941301.1]                             | 98                            | 1,00E-64  |
| CDS_14 | 4362-4724           | Hypothetical protein     | Hypothetical protein<br><i>Vibrio crassostreae</i><br>[WP_132941300.1]                             | 100                           | 1,00E-81  |

|        |             |                                              |                                                                                                     |     |           |
|--------|-------------|----------------------------------------------|-----------------------------------------------------------------------------------------------------|-----|-----------|
| CDS_15 | 4748-5014   | Hypothetical protein                         | Hypothetical protein EDB35_13114 <i>Vibrio crassostreae</i> [TCN02916.1]                            | 100 | 5e-58     |
| CDS_16 | 5014-5508   | Hypothetical protein                         | DUF4406 domain-containing protein <i>Vibrio crassostreae</i> [WP_207904214.1]                       | 99  | 2,00E-117 |
| CDS_17 | 5535-5891   | Hypothetical protein                         | Hypothetical protein <i>Vibrio</i> [WP_132941298.1]                                                 | 100 | 3,00E-82  |
| CDS_18 | 5881-6051   | Hypothetical protein                         | Hypothetical protein <i>Vibrio crassostreae</i> [WP_165922799.1]                                    | 100 | 4,00E-33  |
| CDS_19 | 6054-6149   | Hypothetical protein                         | No match                                                                                            | -   | -         |
| CDS_20 | 6140-6727   | Single strand DNA binding protein            | Single-stranded DNA-binding protein <i>Vibrio crassostreae</i> [WP_132941297.1]                     | 100 | 1e-139    |
| CDS_21 | 6727-7992   | Exonuclease recombination-associated protein | Recombination-associated protein RdgC <i>Vibrio crassostreae</i> [WP_132941296.1]                   | 99  | 0.0       |
| CDS_22 | 8006-8215   | Hypothetical protein                         | Hypothetical protein <i>Vibrio crassostreae</i> [WP_132941295.1]                                    | 100 | 2,00E-43  |
| CDS_23 | 8230-8445   | Lar-like restriction alleviation protein     | Hypothetical protein CGH10_22345 <i>Vibrio parahaemolyticus</i> [TOP74123.1]                        | 91  | 1,00E-41  |
| CDS_24 | 8429-9157   | Anti-termination protein Q-like              | Bacteriophage antitermination protein Q <i>Vibrio crassostreae</i> [WP_132941294.1]                 | 99  | 1,00E-178 |
| CDS_25 | 9169-9783   | CII-like transcriptional activator           | Hypothetical protein <i>Vibrio crassostreae</i> [WP_132941293.1]                                    | 100 | 1,00E-150 |
| CDS_26 | 9780-9977   | Cro/CI family transcriptional regulator      | Cro/CI family transcriptional regulator <i>Vibrio crassostreae</i> [WP_132941292.1]                 | 100 | 1,00E-38  |
| CDS_27 | 10094-10717 | Transcriptional repressor                    | Phage repressor protein C with HTH and peptisase S24 domain <i>Vibrio crassostreae</i> [TCN02906.1] | 99  | 2,00E-147 |

|        |             |                             |                                                                                        |     |           |
|--------|-------------|-----------------------------|----------------------------------------------------------------------------------------|-----|-----------|
| CDS_28 | 10805-10987 | Hypothetical protein        | Hypothetical protein CGH10_24535 <i>Vibrio parahaemolyticus</i> [TOP71479.1]           | 73  | 5,00E-21  |
| CDS_29 | 11050-14712 | Replication protein         | PriCT-2 domain-containing protein <i>Vibrio crassostreae</i> [WP_132941290.1]          | 99  | 0.0       |
| CDS_30 | 14713-15327 | Exonuclease                 | 3'-5' exoribonuclease <i>Vibrio crassostreae</i> [WP_132941289.1]                      | 100 | 1,00E-150 |
| CDS_31 | 15362-17404 | Protelomerase               | Protelomerase family protein <i>Vibrio crassostreae</i> [WP_243701244.1]               | 99  | 0.0       |
| CDS_32 | 17461-17553 | Hypothetical protein        | No match                                                                               | -   | -         |
| CDS_33 | 17555-17653 | Hypothetical protein        | No match                                                                               | -   | -         |
| CDS_34 | 17662-17802 | Hypothetical protein        | hypothetical protein <i>Vibrio</i> sp. 1F_97 [AKN39688.1]                              | 86  | 2,00E-17  |
| CDS_35 | 18025-19191 | ParA-like partition protein | AAA family ATPase <i>Vibrio cortegadensis</i> [WP_261890242.1]                         | 99  | 0.0       |
| CDS_36 | 19188-20141 | ParB-like partition protein | ParB/RepB/Spo0J family partition protein <i>Vibrio cyclitrophicus</i> [WP_016786072.1] | 98  | 0.0       |
| CDS_37 | 20212-20367 | Hypothetical protein        | Hypothetical protein <i>Vibrio</i> [WP_165922801.1]                                    | 100 | 2,00E-29  |
| CDS_38 | 20394-20648 | Hypothetical protein        | Hypothetical protein <i>Vibrio crassostreae</i> [WP_132941325.1]                       | 96  | 3,00E-52  |
| CDS_39 | 20699-21136 | Transcriptional regulator   | Helix-turn-helix transcriptional regulator <i>Vibrio</i> [WP_016786069.1]              | 99  | 2,00E-72  |
| CDS_40 | 21106-21231 | Hypothetical protein        | No match                                                                               | -   | -         |
| CDS_41 | 21281-21463 | Hypothetical protein        | Hypothetical protein <i>Vibrio</i> [WP_016786068.1]                                    | 98  | 1,00E-33  |
| CDS_42 | 21673-22956 | Hypothetical protein        | SGNH/GDSL hydrolase family protein <i>Shewanella oneidensis</i> [WP_011072650.1]       | 50  | 8,00E-132 |

|        |             |                                |                                                                                                          |     |           |
|--------|-------------|--------------------------------|----------------------------------------------------------------------------------------------------------|-----|-----------|
| CDS_43 | 22953-23957 | Tail protein                   | Contractile injection system protein, VgrG/Pvc8 family <i>Vibrio crassostreae</i> [WP_132941322.1]       | 99  | 0.0       |
| CDS_44 | 23948-24121 | Baseplate hub                  | Tail protein X <i>Vibrio</i> [WP_016785912.1]                                                            | 100 | 2e-33     |
| CDS_45 | 24129-24533 | Tail protein                   | Phage tail protein <i>Vibrio</i> [WP_132941321.1]                                                        | 100 | 5,00E-94  |
| CDS_46 | 24533-26323 | Tail protein                   | Phage tail protein <i>Vibrio crassostreae</i> [WP_132941320.1]                                           | 99  | 0.0       |
| CDS_47 | 26304-26432 | Hypothetical protein           | Hypothetical protein EDB35_13146 <i>Vibrio crassostreae</i> [TCN02948.1]                                 | 97  | 5,00E-20  |
| CDS_48 | 26429-26719 | Tail protein                   | Phage tail assembly protein <i>Vibrio crassostreae</i> [WP_132941319.1]                                  | 98  | 6,00E-62  |
| CDS_49 | 26789-27304 | Major tail tube protein        | Phage major tail tube protein <i>Vibrio</i> [WP_132700124.1]                                             | 100 | 4,00E-119 |
| CDS_50 | 27304-28770 | Tail sheath protein            | Phage tail sheath subtilisin-like domain-containing protein <i>Vibrio alginolyticus</i> [WP_258510186.1] | 98  | 0.0       |
| CDS_51 | 28831-30816 | Hypothetical protein           | SGNH/GDSL hydrolase family protein <i>Shewanella oneidensis</i> [WP_011072650.1]                         | 60  | 0.0       |
| CDS_52 | 30822-31454 | Tail protein                   | TPA: phage tail protein I <i>Vibrio parahaemolyticus</i> [HCG8352157.1]                                  | 76  | 9,00E-118 |
| CDS_53 | 31451-32344 | Baseplate protein              | Baseplate J/gp47 family protein <i>Vibrio chagasii</i> [WP_150897831.1]                                  | 91  | 0.0       |
| CDS_54 | 32344-32682 | Baseplate protein              | GPW/gp25 family protein <i>Vibrio navarrensis</i> [WP_193246663.1]                                       | 93  | 2,00E-70  |
| CDS_55 | 32688-32978 | PAAR motif of membran proteins | PAAR domain-containing protein <i>Vibrio cyclitrophicus</i> [WP_016785895.1]                             | 96  | 2,00E-57  |

|        |             |                                  |                                                                                                 |     |           |
|--------|-------------|----------------------------------|-------------------------------------------------------------------------------------------------|-----|-----------|
| CDS_56 | 32966-33448 | Hypothetical protein             | Hypothetical protein<br><i>Paraglaciecola sp.</i><br>[WP_299075741.1]                           | 95  | 8,00E-108 |
| CDS_57 | 33448-34023 | Baseplate assembly protein       | Phage baseplate assembly protein V<br><i>Vibrio alginolyticus</i><br>[WP_258510196.1]           | 97  | 4,00E-134 |
| CDS_58 | 34016-34546 | Hypothetical protein             | Hypothetical protein<br><i>Vibrio</i><br>[WP_016785892.1]                                       | 100 | 6,00E-128 |
| CDS_59 | 34543-35133 | Tail completion or Neck1 protein | Hypothetical protein<br><i>Vibrio crassostreae</i><br>[WP_132941331.1]                          | 100 | 3,00E-139 |
| CDS_60 | 35096-35458 | Head closure Hc1                 | Head-tail joining protein<br><i>Vibrio crassostreae</i><br>[WP_132941310.1]                     | 99  | 7,00E-80  |
| CDS_61 | 35448-35876 | Hypothetical protein             | Hypothetical protein<br><i>Vibrio crassostreae</i><br>[WP_132941309.1]                          | 99  | 5,00E-96  |
| CDS_62 | 35932-36963 | Major capsid protein             | Major capsid protein<br><i>Vibrio crassostreae</i><br>[WP_132941308.1]                          | 100 | 0.0       |
| CDS_63 | 37026-37364 | Hypothetical protein             | Hypothetical protein<br><i>Vibrio</i><br>[WP_016786052.1]                                       | 99  | 5,00E-72  |
| CDS_64 | 37364-38674 | Capsid maturation protease       | S49 family peptidase<br><i>Vibrio cyclitrophicus</i><br>[WP_016786051.1]                        | 99  | 0.0       |
| CDS_65 | 38637-40241 | Portal protein                   | Phage portal protein<br><i>Vibrio</i><br>[WP_132941305.1]                                       | 99  | 0.0       |
| CDS_66 | 40241-40441 | Head-tail adaptor Ad1            | gpW family head-tail joining protein<br><i>Vibrio</i><br>[WP_016786049.1]                       | 100 | 4,00E-38  |
| CDS_67 | 40445-42418 | Terminase large subunit          | Phage terminase large subunit family protein<br><i>Vibrio cortegadensis</i><br>[WP_261890222.1] | 99  | 0.0       |
| CDS_68 | 42306-42893 | Terminase small subunit          | Hypothetical protein<br><i>Vibrio cortegadensis</i><br>[WP_261890221.1]                         | 100 | 4,00E-139 |

**Table S3.** Differences in biochemical profile of PF4 strain and lysogenic strain P1.1 of *V. anguillarum* with BIOLOG GEN III.

| BIOLOG Test                    | <i>V. anguillarum</i> <sup>ab</sup> |        |       |
|--------------------------------|-------------------------------------|--------|-------|
|                                | PF4                                 | P1.1   |       |
| Gelatin                        | Purple                              | White  | Green |
| Tween 40                       | Purple                              | White  | Green |
| Glycyl-L-Proline               | Purple                              | Purple | Green |
| D-Fructose                     | Purple                              | Purple | Green |
| $\alpha$ -Hydroxy-Butyric Acid | White                               | Purple | Green |
| D-Trehalose                    | Purple                              | Purple | Green |
| $\beta$ -Methyl-D Glucoside    | Purple                              | Purple | Green |
| D-Gluconic Acid                | Purple                              | White  | Green |
| Acetic Acid                    | Purple                              | White  | Green |
| Sodium Butyrate                | Purple                              | White  | Red   |
| Potassium Tellurit             | Purple                              | Purple | Red   |

<sup>a</sup> Purple color indicates a positive reaction (growth), white indicates negative reaction (no growth) and light purple indicates an intermediate reaction.

<sup>b</sup> The right column indicates whether the test is for susceptibility to the compound (red) or for its use as a carbon source (green).
